# Supplementary material for: Up-regulation of HLA class-I antigen expression and antigen-specific CTL response in cervical cancer cells by the demethylating agent hydralazine and the histone deacetylase inhibitor valproic acid
Source: Springer Nature journal article supplement (doi:10.1186/1479-5876-4-55), 2006-06-01
Supplement: 12967_2006_160_MOESM5_ESM.pdf [file 12967_2006_160_MOESM5_ESM.pdf]

**% CITOTOXICITY**

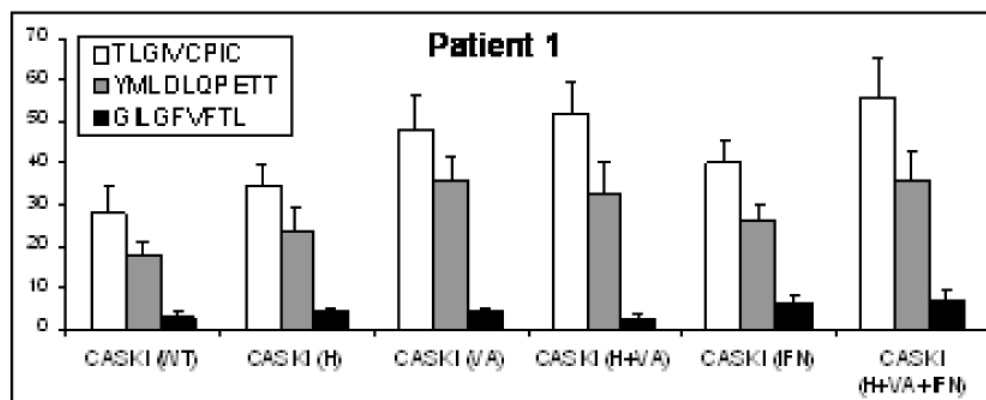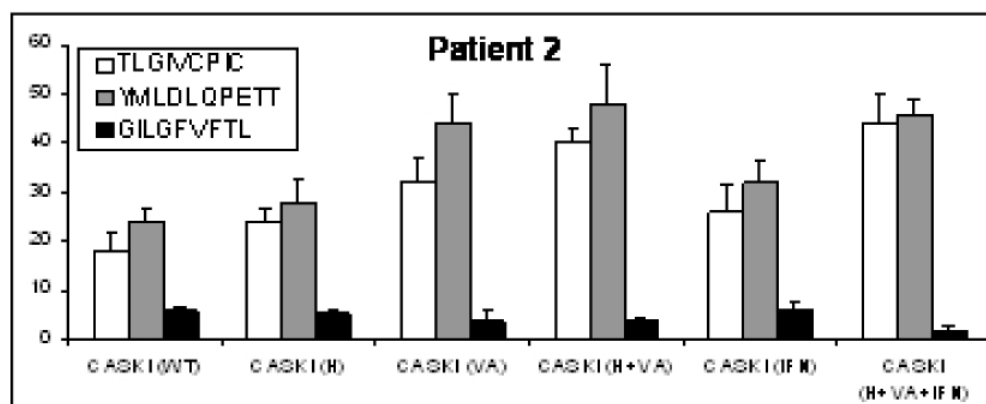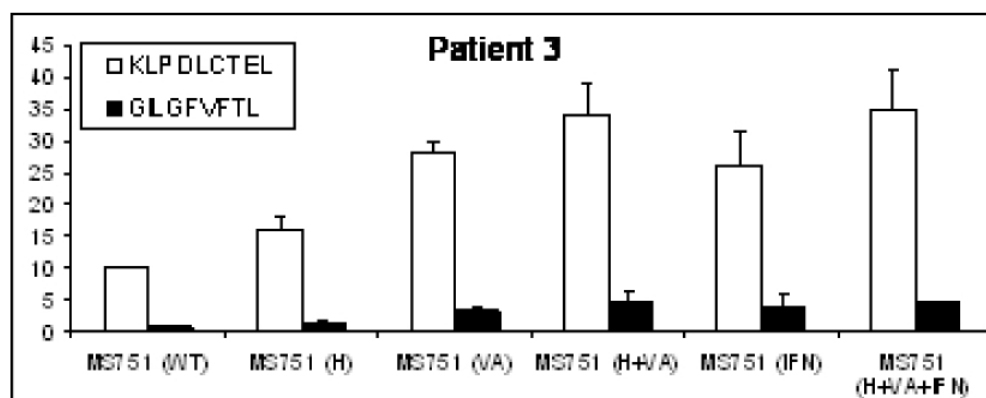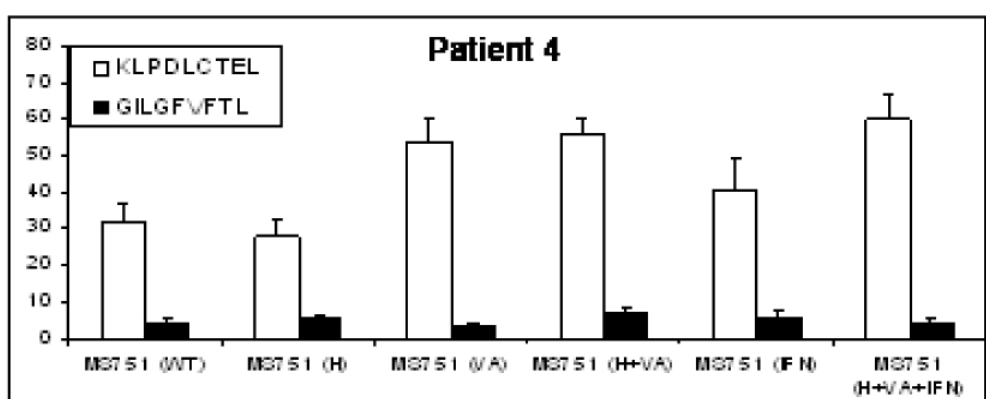

**TREATMENTS**
