# Supplementary material for: Up-regulation of HLA class-I antigen expression and antigen-specific CTL response in cervical cancer cells by the demethylating agent hydralazine and the histone deacetylase inhibitor valproic acid
Source: Springer Nature journal article supplement (doi:10.1186/1479-5876-4-55), 2006-06-01
Supplement: 12967_2006_160_MOESM6_ESM.pdf [file 12967_2006_160_MOESM6_ESM.pdf]

**(A)**

**[-]**

**H**

**VA**

**H+VA**

**IFN**

**H+VA+IFN**

**β-actin**

**E7/HPV16**

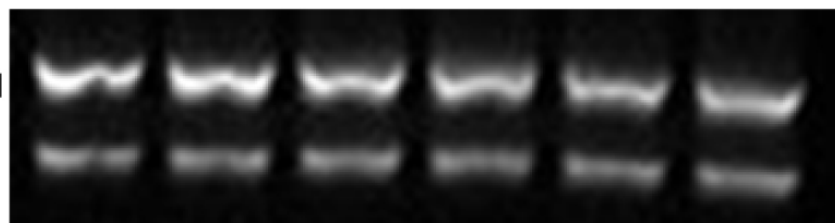

**238 bp**

**166 bp**

**(B)**

**β-actin**

**E6/HPV18**

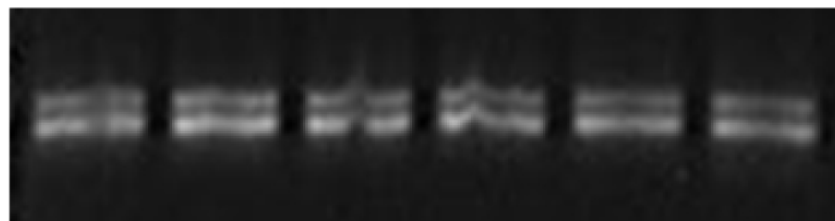

**238 bp**

**214 bp**

**TREATMENTS**
